# Supplementary material for: A widespread role of the motif environment in transcription factor binding across diverse protein families
Source: Genome Res. 2015 Sep;25(9):1268–80. doi: 10.1101/gr.184671.114 (PMC4561487; doi:10.1101/gr.184671.114)
Supplement: Supplemental Material [file supp_gr.184671.114_Supp_Tables.xlsx]

## Sheet: S1 HT-SELEX TFs selected
TF	family	batch	seed	selected cycle
Alx1	homeodomain	TAAAGC20NCG	NNYAATTANN	3
ALX3	homeodomain	TGTAAA20NAAG	NNYAATTANN	2
Barhl1	homeodomain	TCAGTC20NCG	NNTAATTGNN	2
BARHL2	homeodomain	TCCAGT40NGAC	NNTAATTGNN	3
BARX1	homeodomain	TATTCG20NCTG	NYNATTAN	3
BCL6B	C2H2	TGCGGG20NGA	TGCTTTCTAGGAATTMM	4
BSX	homeodomain	TATGAA20NCG	NYNATTAN	3
CDX1	homeodomain	TCAACC20NCAA	NYMATAAAN	3
CDX2	homeodomain	TACTTG20NCG	NYMATAAAN	4
CENPB	CENPB	TGCTGT20NGTC	CCCGCNTNNNRCGAA	3
CTCF	C2H2	TAGCGA20NGCT	NGCGCCMYCTAGYGGTN	4
CUX1	CUT	TAGCAG40NACT	TAATCRATAN	3
CUX2	CUT	TAGCCT40NCCT	TAATCRATAN	3
Dlx1	homeodomain	TGAGAT20NCG	NYAATTAN	2
Dlx2	homeodomain	TCGCCA20NCCT	NYAATTAN	3
DLX3	homeodomain	TATGTT20NCG	NYAATTAN	2
DLX4	homeodomain	TCTTCT20NGA	NYAATTAN	3
DLX5	homeodomain	AGGGC14N	NYAATTAN	3
DLX6	homeodomain	TGCGGG20NGA	NYAATTAN	3
DMBX1	homeodomain	TAACCC20NCCA	NNGGATTANN	4
DPRX	homeodomain	TCGAAG30NAAT	NNGGATTANN	2
EGR1	C2H2	TCTCTT20NGA	NMCGCCCMCGCANN	2
EGR2	C2H2	TCGGCC20NGA	MCGCCCACGCA	3
EGR3	C2H2	TTAAGA20NGAA	NNACGCCCACGCANN	3
EGR4	C2H2	TAGCGA40NGCT	NNMCGCCCACGCANNN	4
ELF1	ETS	TGGGTA20NGA	AACCCGGAAGTN	7
ELF3	ETS	TCCGTG20NTGC	WACCCGGAAGTA	3
ELF5	ETS	TCTCGG20NGA	ACCCGGAAGTN	2
ELK1	ETS	TCGGAA20NAGT	ACCGGAAGTN	2
Elk3	ETS	TGAGTG20NTGA	ACCGGAAGTN	3
ELK4	ETS	TAGGGC40NGGT	ACCGGAARTN	3
EMX1	homeodomain	TCGCAT30NACT	NNYAATTANN	3
EMX2	homeodomain	TGGTTC30NTTT	NNYAATTANN	4
EN1	homeodomain	TGACCT20NCCA	NYAATTAN	3
EN2	homeodomain	TGCCAT20NGA	NNYAATTANN	3
EOMES	TBX	TGTAAA30NAAG	NAGGTGTGAAAWN	3
ERF	ETS	TCAGAG20NCG	ACCGGAAGTN	4
ERG	ETS	TCTACA20NCAG	ACCGGAARTN	2
ESRRA	nuclearreceptor	TGACGA30NGCA	NTCAAGGTCAN	4
ESRRB	nuclearreceptor	ATTAC14N	TCAAGGTCAWN	4
ESRRG	nuclearreceptor	TGACGA20NGCA	TSAAGGTCAN	4
ESX1	homeodomain	TCTCGG20NGA	NNYAATTANN	2
ETS1	ETS	TGTACC30NCAG	ACCGGAARYN	2
ETV1	ETS	TCGTTA20NTTT	ACCGGAARYN	2
ETV2	ETS	TGGAGC20NGAT	AACCGGAARTR	3
ETV3	ETS	TCAGGA20NCG	ACCGGAAGTN	4
ETV4	ETS	TCTATG20NTAG	ACCGGAAGTN	2
ETV5	ETS	TGCACT20NGA	ACCGGAWGYN	2
ETV6	ETS	TGAGTG20NGA	KSYGGAAGTN	3
EVX1	homeodomain	TGGGAC20NAGT	NNTNATTANN	3
EVX2	homeodomain	TCAAGG20NGAA	NNTNATTANN	3
FEV	ETS	TGATCC20NCTA	ACCGGAAGTN	3
FLI1	ETS	TAGGAT20NAGT	ACCGGAARYN	3
FOXB1	forkhead	TGAGCA30NCGA	WRWGTMAAYAN	3
FOXC1	forkhead	TGAGGC30NGGA	WRWRTMAAYAW	3
FOXC2	forkhead	TGAGTG30NTGA	WAWRTAAAYAWW	3
FOXD2	forkhead	TGCTCG20NCTC	RTAAAYA	2
FOXD3	forkhead	TGGGGT20NGGT	RTAAAYA	3
Foxg1	forkhead	TATCTG20NTCG	RTAAAYA	4
FOXI1	forkhead	TCGGAA20NGA	GTAAACA	4
FOXJ2	forkhead	TGACGA20NGA	RTAAACAA	2
Foxj3	forkhead	TAAACA20NCAA	RTAAACAA	3
Foxk1	forkhead	TGGGTA20NCG	RTAAACA	4
FOXL1	forkhead	TGCTCG20NCTC	RTAAAYA	2
FOXO1	forkhead	TTCAGC20NTA	GTAAACAA	3
FOXO3	forkhead	TGTTGC20NGTG	GTAAACAW	4
FOXO4	forkhead	TGACTC20NGA	GTAAACA	3
FOXO6	forkhead	TCGTGT30NGTT	GTAAACA	3
FOXP3	forkhead	TCAATT20NTAA	RTAAACA	4
GABPA	ETS	TGGCCC20NCCT	ACCGGAAGTN	4
GATA3	GATA	TCATGC20NCG	AGATAANN	2
GATA4	GATA	TAAAAT20NAAA	AGATAANN	2
GATA5	GATA	TAAATG20NTAA	AGATAANN	2
GBX1	homeodomain	TAGTCC20NCG	NNYAATTANN	4
GBX2	homeodomain	TCCCGA20NGCC	NNYAATTANN	3
GCM1	GCM	TCCAGT20NGAC	NATGCGGGTAN	4
GCM2	GCM	TGACTC20NTCA	NATGCGGGTN	3
GLI2	C2H2	TAAGTA40NTGA	GCGACCACNCTG	3
GLIS1	C2H2	TTCGGT20NGA	NGACCCCCCACGANGN	4
GLIS2	C2H2	TACTAT20NATC	GACCCCCCGCGNNG	3
GSC	homeodomain	TGGGAC20NGA	NNTAATCCNN	3
GSC2	homeodomain	TTAGAA20NTA	NNTAATCCNN	3
GSX1	homeodomain	TCACAC20NCG	NNYMATTANN	4
GSX2	homeodomain	TCCAAC20NCG	NNYMATTANN	3
HESX1	homeodomain	TCTTCT20NCTG	NNTAATTRNN	3
Hic1	C2H2	TCATCA20NCTA	RTGCCMNCN	4
HIC2	C2H2	TGAGCA20NGA	RTGCCMNNN	4
HINFP1	C2H2	TCAAGG20NGAA	CAACGTCCGCNN	3
HMBOX1	homeodomain	TCCTGG20NCG	NYTAGTTAMN	4
HMX1	homeodomain	TCGCCA20NCCT	NNCAMTTAANN	4
HMX2	homeodomain	TAGTGG20NCG	NNCAMTTAANN	4
HMX3	homeodomain	TGCACT30NCAC	NNCAMTTAANN	3
HOXA1	homeodomain	TGGAAT20NAAT	NNYAATTANN	3
HOXA10	homeodomain	TAGGAT30NAGT	NGYAATWAAAN	4
Hoxa11	homeodomain	TCCCCT20NCG	NGYAATWAAAN	4
HOXA13	homeodomain	TTCTCT20NTA	CCAATAAAAN	3
Hoxa2	homeodomain	TACCGT20NCG	NNYMATTANN	3
HOXB13	homeodomain	TGCCTG20NGA	CCAATAAAAN	3
HOXB2	homeodomain	TAACAA20NACA	NNYMATTANN	2
HOXB3	homeodomain	TACATT20NTAC	NNYMATTANN	3
HOXB5	homeodomain	TCTTGA20NGTG	NNYMATTANN	3
HOXC10	homeodomain	TGGACA20NGA	GTAATWAAAN	3
HOXC11	homeodomain	TCACTA20NTCA	NGYAATWAAAN	4
HOXC12	homeodomain	TCATGC20NGTA	GYAATAAAA	4
HOXC13	homeodomain	TCCCTC20NTCC	CCAATAAAAN	3
HOXD11	homeodomain	TCCGGC20NGGC	NGYAATAAAA	4
HOXD12	homeodomain	TCAGTC20NCG	GTAATAAAA	4
Hoxd13	homeodomain	TGATAA20NATA	CCAATAAAAN	4
Hoxd3	homeodomain	TGCCAT20NCG	NNYAATTANN	4
HOXD8	homeodomain	TCATAT20NATA	NNTAATTANN	4
Hoxd9	homeodomain	TCCTAA20NCG	CCCATAAAN	4
IRF5	IRF	TAACAA20NCG	NACCGAAACYN	3
ISL2	homeodomain	TCTAAT30NAAG	GCACTTAA	4
ISX	homeodomain	TATTTA20NCG	NYAATTAN	2
KLF13	C2H2	TGGACA20NGA	NNGNNACGCCCMYTTTNN	4
KLF14	C2H2	TTGGGA20NTA	NGCCACGCCCMCNT	3
KLF16	C2H2	TTGATT20NTA	GCCMCGCCCMC	4
LBX2	homeodomain	TAATTC20NTTA	NNYAATTANN	2
LEF1	HMG	TCCCGA20NGCC	AAAGATCAAAGGRWW	4
LHX2	homeodomain	TCCAGT30NGAC	NCTAATTANN	4
Lhx4	homeodomain	TAAATG20NTAA	NTAATTAN	3
LHX6	homeodomain	TCGGGG20NGGT	NYTAATTARN	4
Lhx8	homeodomain	TGCTCG40NCTC	NTAATTAN	3
LHX9	homeodomain	TATTGT20NGTG	NYAATTAN	2
LMX1A	homeodomain	TCTGGT20NGGG	NTAATTAN	3
LMX1B	homeodomain	TGAGGC20NGGA	NYAATTAN	2
Mafb	bZIP	TCGTTA20NTTT	NNNNTGCTGACN	3
MAFK	bZIP	TTAAAG20NTA	NNNNNTGCTGAN	3
MEIS1	MEIS	TGACCT20NGA	NTGACAN	6
Meis2	MEIS	TCAAAA20NTA	NTGACAN	3
MEIS3	MEIS	TGGGTA20NGA	NTGACAGN	2
MEOX1	homeodomain	TACCTA20NCG	NSTAATTANN	4
MEOX2	homeodomain	TAGTTT30NTTT	NSTAATTANN	3
MGA	TBX	TAGGGC20NGGT	AGGTGTGA	3
MIXL1	homeodomain	TGATTT20NTTA	NNYAATTANN	3
MNX1	homeodomain	TGGTGA20NGTT	NNYAATTANN	4
MSX1	homeodomain	TGCGAA30NAGC	NYAATTAN	3
MSX2	homeodomain	TGCGGG20NGA	NYAATTAN	3
Msx3	homeodomain	TCGACT20NCAT	NYAATTAN	3
MYBL1	MYB	TTGCGT20NTA	NNAACCGTTNN	4
MYBL2	MYB	TGAGTG20NGA	NNAACCGTTNN	3
NKX2-3	homeodomain	TGGAAT20NGA	NCCACTTRAN	4
NKX2-8	homeodomain	TAGGCA20NCG	NCACTTNAN	4
Nkx3-1	homeodomain	TCTTAG20NATG	NCCACTTAA	4
NKX3-2	homeodomain	TCCAGT20NGAC	NCCACTTAA	3
NKX6-1	homeodomain	TGCGGG30NGGC	NYMATTAN	3
NKX6-2	homeodomain	TTACAT20NTA	NYMATTAN	3
NOTO	homeodomain	TGCGTT30NTGC	NYTMATTANN	4
Nr2e1	nuclearreceptor	TCGCGC20NGCT	AAAAGTCAA	4
NR2F1	nuclearreceptor	TCTGAC20NGA	RRGGTCAN	4
NR4A2	nuclearreceptor	TCATTG20NTTA	TTTAAAGGTCA	4
NRL	bZIP	TGGAGC20NGA	NNNNTGCTGAN	4
ONECUT1	CUT	TAGCTC20NTCT	NNAAAATCRATAWN	3
ONECUT2	CUT	TGGGCG30NCGT	NNAAAATCRATAWN	2
ONECUT3	CUT	TAGAAC20NAAT	NNAAAATCRATANN	3
OTX1	homeodomain	TGATAA20NGA	NTAATCCN	3
OTX2	homeodomain	TATGGG20NGGG	NTAATCCN	4
PAX1	PAX	TAACTT20NTCA	SGTCACGCWTGANTGMA	4
PAX2	PAX	TCCACG20NCAC	NGTCACGCWTSRNTGNNY	3
PAX4	PAX	TATTTA20NTTG	CTAATTAG	4
PAX5	PAX	TACAGG20NGAC	NGTCACGCWTSRNTGNNY	3
PAX6	PAX	TCCATA20NTAC	TTTYACGCWTGANTGMNYN	4
PAX9	PAX	TCTAAT20NAAG	SGTCACGCWTGANTGMA	4
PDX1	homeodomain	TGGAAT30NAAT	NYMATTAN	3
PITX1	homeodomain	TGAGCA20NCGA	NTTAATCCN	3
PITX3	homeodomain	TGCATC20NGA	NYTAATCCN	2
POU1F1	POU	TACACC40NCAC	NNYATGMATAATTAATN	3
POU2F1	POU	TCTTTC20NGA	NWTATGCWAATN	2
Pou2f2	POU	TAGATA20NTAT	TATGCAAAT	3
POU2F3	POU	TAGACG20NCAT	TATGCWAAT	2
POU3F1	POU	TAGCGA20NGCT	WTGMATAAWTNA	2
POU3F2	POU	TGTTCA40NCTG	WTATGCWAATKA	3
POU3F3	POU	TCGCAT20NACT	WTGMATAAWTNA	4
POU3F4	POU	TACTGC20NGTC	TGMATWWWTNA	3
POU4F1	POU	TACAAA20NAAC	ATGMATAATTAATG	3
POU4F2	POU	TACGAG20NAGC	NTGMATAATTAATKAG	3
POU4F3	POU	TACCGT20NGCC	NTGMATAATTAATGAN	3
POU5F1P1	POU	TAGAGT20NGAT	WTRMATATKYAW	3
POU6F2	POU	TGCTGT20NCG	NSCTMATTAN	3
PRRX1	homeodomain	TAACGG20NGCA	NYAATTAN	2
Prrx2	homeodomain	TATGAA20NAGG	NYAATTAN	3
RAX	homeodomain	TGGTAG20NATT	NNYAATTANN	3
RAXL1	homeodomain	TACTCA20NTA	NYAATTAN	2
Rhox11	homeodomain	TGGCCC20NCG	NGCTGTWAN	4
RHOXF1	homeodomain	TGGATG30NTAT	NTRAKCCN	3
RUNX2	RUNX	TACCTA40NTCC	WAACCRCAN	4
RUNX3	RUNX	TACGGA30NGGC	NAACCGCAAN	3
SCRT1	C2H2	TCTTAG20NATG	NNGCAACAGGTGGNN	4
SCRT2	C2H2	TGGGCG20NCGT	NNGCAACAGGTGN	3
SHOX	homeodomain	TAAGGT20NGGA	NYAATTAN	2
Shox2	homeodomain	TCCCAG20NACC	NYAATTAN	2
SNAI2	C2H2	TCGTTA20NGA	NRCAGGTGN	6
SOX9	HMG	TCTCAA20NGA	NAACAATRN	4
SP1	C2H2	TCTATG20NGA	GCCMCGCCCMC	4
SP3	C2H2	TCGGCC20NGA	GCCMCGCCCMC	6
SP4	C2H2	TTATGT20NGTA	NWRGCCMCGCCCMCTNN	4
SP8	C2H2	TGCTCG20NCTC	NMCMCGCCCMCN	4
SPDEF	ETS	TCATTG20NCG	AMCCGGATGTN	3
SPI1	ETS	TCCCCT20NCG	AAAAAGCGGAAGTN	3
SPIB	ETS	TGTCTA20NTCG	AAAAAGMGGAAGTN	2
Spic	ETS	TATAGA20NCG	AAAAAGMGGAAGTA	4
TBR1	TBX	TCACAC20NACA	AGGTGTGANN	3
TBX1	TBX	TACGGA40NGGC	AGGTGTGA	4
TBX15	TBX	TACGTC40NTGC	AGGTGTGA	4
TBX2	TBX	TCTATG20NTAG	NAGGTGTGAWN	4
TBX20	TBX	TACTCA40NCTC	HNHNAGGTGTGANHH	3
TBX21	TBX	TACTGC40NGTC	NAGGTGTGAA	3
TBX4	TBX	TACTTG40NTTC	AGGTGTGA	3
TBX5	TBX	TAGAAC40NAAT	AGGTGTGA	3
Tcf7	HMG	TATATC20NCG	NAAGATCAAAGG	4
TCF7L1	HMG	TGGACA20NCAT	NAASATCAAAGN	4
TEAD1	TEA	TCTTAG20NATG	NRMATWCCWN	4
TEAD3	TEA	TATAAG40NAAG	RMATWCCA	3
TEAD4	TEA	TGATTT20NTTA	NRCATTCCWN	4
UNCX	homeodomain	TGCAAG20NGA	NYAATTAN	2
VAX1	homeodomain	TGCCAT20NACC	YTAATTAN	2
VAX2	homeodomain	TGGTAG20NATT	YTAATTAN	3
VENTX	homeodomain	TGAAGT30NGAA	NMCRATTAR	4
VSX1	homeodomain	TGGTTC20NTTT	YTAATTAN	2
VSX2	homeodomain	TCTCCC20NCCG	YTAATTAN	2
YY1	C2H2	TCCGGC20NCG	NCCGCCATTNN	3
YY2	C2H2	TGAGCA20NGA	NCCGCCATNNT	2
ZBTB7A	C2H2	TGAATA20NGA	NGCGACCACCNN	4
ZBTB7B	C2H2	TAGCCT20NCG	NCGACCACCGAN	3
ZBTB7C	C2H2	TCGCCA40NCCT	NCGACCACCNAN	4
Zfp652	C2H2	TACGAG20NCG	NNAAAGGGTTAAW	4
Zfp740	C2H2	TCAACC20NCG	NCCCCCCCAC	3
ZIC1	C2H2	TCGACT20NCAT	GACCMCCYRMTGNG	4
Zic3	C2H2	TCAAAA20NAAA	GACCMCCYRMTGNGN	3
ZIC4	C2H2	TGAGGC20NGA	GACCCCCYGYTGNGN	3
ZNF143	C2H2	TGCAAG20NCG	TWCCCAYAATGCATTG	4
ZNF238	C2H2	TAGTAA20NATT	NNTCCAGATGTKN	3
ZNF306	C2H2	TAGGGC20NGGT	TGGKCTARCCTCGA	4
ZNF410	C2H2	TGCACT20NGA	NNCATCCCATAATANTC	3
ZNF524	C2H2	TCTATG40NTAG	CTCGRACCCGTGCN	5
ZNF740	C2H2	TGTGAG20NGA	NCCCCCCCAC	4
ZNF75A	C2H2	CCATA14N	GCTTTTCCCACA	4
ZNF784	C2H2	TGCGGG20NGA	GTACCTACCT	3
ZSCAN4	C2H2	TCTTTC20NTTG	TGCACACNCTGAAAA	3

## Sheet: S2 ChIP-seq TFs selected
TF	family	seed
TBX3	T-box	AGGTGTGA
ASCL2	bHLH	RRCAGCTGYY
ATF5	TF_bZIP	NGGATGATGCAATM
ATOH1	bHLH	RNCATATGNY
BARHL1	Homeobox	CCAATTA
CLOCK	bHLH	NNCACGTGNN
CREB3L4	TF_bZIP	NTGCCACGTCAYCN
CTCF	C2H2	NGCGCCMYCTAGYGGTN
DBP	TF_bZIP	NRTTACRTAAYN
DLX1	Homeobox	TTAATTA
E2F2	E2F	GGCGCCAAAANN
E2F4	E2F	GGCGCCAAAANN
E2F7	E2F	TTTCCCGCCAAA
E2F8	E2F	TTTCCCGCCAAA
EHF	ETS	AACCCGGAAGTR
ELF1	ETS	ACCGGAAGTN
ESR1	nuclearreceptor	NNGGTCANNNTGACCNN
ESRRA	nuclearreceptor	TTCAAGGTCAN
ETS2	ETS	ACCGGAAGTN
ETV4	ETS	ACCGGAAGTN
FEV	ETS	ACCGGAAGTN
FOXD2	Fork head	NMGGACACAATC
FOXG1	Fork head	CGGACACAAT
GATA1	zf-GATA	AGATAANN
GATA4	zf-GATA	AGATAANN
GLI2	C2H2	GACCACMCACNNNG
GLI3	C2H2	GACCMCCYRMTGNG
GMEB2	SAND	WRCGTAACCACGYN
HNF4A	Thyroid hormone receptor	RRGGTCAAAGTCCRNN
HOXA13	Homeobox	TTTACGAG
HOXA2	Homeobox	GNTAATTANC
KLF3	C2H2	GRCCACGCCCWNNNN
KLF5	C2H2	GRCCACGCCCWNNNN
LHX2	Homeobox	NTAATTAN
MEF2C	NOTFOUND	MCCATATAWGGN
MNT	bHLH	NNCACGTGNN
MYBL2	MYB	NCCGTTAACGGN
MYC	bHLH	CACGTGNNNNNCACGTG
NFAT5	RHD	RTGGAAAANTMCNN
NFE2L2	TF_bZIP	ATGASTCAT
NR2F1	NR2F	RRGGTCAAAGGTCA
NR2F2	NR2F	DNNNGGTCANNNH
RARG	Thyroid hormone receptor	RGGTCANNNARRGGTCA
RFX2	RFX	NGTTRCCATGGYAACN
RFX1	RFX	TGGYAACN
RFX5	RFX	TGGYAACN
RXRA	Thyroid hormone receptor	RGGTCATGACCY
SP1	C2H2	GCCMCGCCCMC
SP2	C2H2	NNGNNACGCCCMYTTTNN
SP3	C2H2	NNGNNACGCCCMYTTTNN
TCF7L2	HMG	AAAGATCAAAGGRWW
TEAD2	TEA	NRMATWCCWN
TFAP2A	AP-2	NGCCNNNNGGCN
TP73	P53	NNCATGNNNNGRCATGNN
YY1	C2H2	NNCCGCCATNW
ZBTB7B	C2H2	NGCGACCACCNN

## Sheet: S3 #BSs
Average number of binding sites detected in each of the bound sequences, using different FIMO cutoffs (excluding the core motif)
TF name	Family	≤0.001	0.005-0.001	0.01-0.005	0.05-0.1	>0.1
ASCL2	bHLH	2.30738	6.0995	5.66189	37.2097	39.0392
ATOH1	bHLH	0.449721	2.41713	2.22067	21.1164	29.2263
MYC	bHLH	0.788742	3.05015	3.3054	27.0382	34.626
CLOCK	bHLH	0.73545	1.68078	3.10141	20.7169	28.8069
MNT	bHLH	0.962087	1.88035	4.01217	22.1576	33.665
ATF5	bZIP	1.6355	6.35091	7.76565	56.9094	66.4683
CREB3L4	bZIP	2.55669	8.46497	9.7172	64.6433	68.2242
KLF3	C2H2	6.35427	14.7254	14.2552	82.3494	78.2198
KLF5	C2H2	6.47571	15.4578	15.1138	84.5917	79.1146
SP1	C2H2	10.879	21.8851	21.0089	105.241	92.0488
YY1	C2H2	3.19193	7.96372	12.2291	68.2434	68.2162
ZBTB7B	C2H2	3.77546	12.9781	13.742	86.1786	87.5368
SP2	C2H2	2.69565	8.7764	9.87311	65.4188	69.276
SP3	C2H2	2.43378	7.91939	9.32182	62.9578	69.1536
GLI2	C2H2	3.01205	10.831	10.8197	73.9084	78.4302
CTCF	C2H2	1.86645	6.79265	8.07544	57.1942	63.7558
GLI3	C2H2	2.11417	7.84067	10.3285	64.8948	66.9795
E2F4	E2F	1.705	6.72333	7.84333	58.615	66.7567
E2F7	E2F	1.30371	5.15321	6.21196	46.3329	54.4916
E2F8	E2F	1.18966	4.8568	5.85393	45.5153	54.3712
E2F2	E2F	1.55361	5.20987	7.90312	52.1572	57.4921
ELF1	ETS	2.01668	6.49274	7.71813	54.1302	64.9672
EHF	ETS	1.71481	5.92817	7.35394	50.7115	59.4271
ETS2	ETS	1.33798	5.48359	5.94778	47.7807	58.5703
ETV4	ETS	1.54198	6.37691	7.55916	54.4924	65.292
FEV	ETS	1.46569	6.03037	6.60742	52.7379	66.7627
DLX1	HD	1.59864	8.41057	8.20601	61.1701	70.666
HOXA2	HD	1.26819	3.99168	5.77339	38.921	27.6611
BARHL1	HD	1.20355	5.39979	5.51253	49.2902	56.0219
LHX2	HD	1.58824	3.29864	7.33635	37.0483	38.5852
HOXA13	HD	1.77142	5.43654	6.51546	47.3224	66.2577
MYBL2	OTHER	0.589686	3.52691	4.49776	33.9888	40.7601
TFAP2A	OTHER	2.56069	6.70809	6.86272	40.9538	37.9697
NR2F2	OTHER	2.71429	4.88492	6.13095	42.5675	73.5119
GATA1	OTHER	3.19565	6.70949	15.7016	61.2549	76.4328
HNF4A	OTHER	1.86064	6.23635	7.29421	52.4817	59.7286
NR2F1	OTHER	2.4226	7.32282	8.64417	56.5906	60.215
FOXD2	OTHER	1.40152	6.16048	5.83095	49.0752	59.5189
ESRRA	OTHER	1.4033	4.79285	6.09258	45.9065	53.5353
FOXG1	OTHER	1.41063	5.44934	6.88425	50.6797	57.3214
GMEB2	OTHER	0.684589	3.47333	4.42379	40.3205	52.5131
RFX2	OTHER	0.600228	2.10421	2.6623	21.6105	27.1708
GATA4	OTHER	2.19949	5.169	12.7484	52.9301	62.0953
RFX5	OTHER	1.02188	4.79537	5.34234	43.0862	43.3089
MEF2C	OTHER	0.491124	2.04142	2.5858	27.074	41.3994
RFX1	OTHER	1.00665	4.74738	5.18649	43.9647	41.9699
NFAT5	OTHER	1.31038	4.84469	5.54462	41.8864	50.8653
TCF7L2	OTHER	4.05743	9.94257	10.2804	63.6351	64.8581
RARG	OTHER	2.12472	7.17874	7.79646	54.6072	59.177
TBX3	OTHER	2.77789	6.54403	10.8767	58.907	54.4863
RXRA	OTHER	0.826049	3.27339	4.6785	28.1848	28.1848
TP73	OTHER	0.821321	2.84626	4.54673	35.5053	45.5475
ESR1	OTHER	0.851148	3.04751	3.12906	24.6516	29.5527
TEAD2	OTHER	1.90934	5.34982	8.37594	51.2898	58.8661
NFE2L2	TF_bZIP	0.71369	2.7506	3.0756	25.0476	29.5244
DBP	TF_bZIP	0.698595	2.87484	2.46743	30.9336	48.1992
